# Supplementary material for: Suppression of the dark current in PbS quantum dot infrared photodetectors through the introduction of a CuInSeS interfacial layer
Source: Royal Society of Chemistry journal article supplement (doi:10.1039/d3tc04746f), 2024-01-01
Supplement: d3tc04746f1.pdf [file d3tc04746f1.pdf]

## Supporting Information

### Suppression of Dark Current in PbS Quantum Dot Infrared

### Photodetectors Through the Introduction of a CuInSeS Interfacial Layer

*Zuyan Chen*<sup>#1,3,4</sup>, *Tengzuo Huang*<sup>#1,2,3,4</sup>, *Bo Zhang*<sup>#1,3,4</sup>, *Chunyan Wu*<sup>1,3,4</sup>, *Xuanyu Zhang*<sup>1,3,4</sup>,  
*Tao Sun*<sup>2</sup>, *Wei Xu*<sup>1,3,4</sup>, *Kai Kang*<sup>\*1,3,4</sup>, *Chaoyu Xiang*<sup>\*1,3,4</sup>, *Ting Zhang*<sup>\*1,3,4</sup>, and *Ruifeng Li*<sup>\*1,3,4</sup>

<sup>1</sup>Laboratory of Advanced Nano-Optoelectronic Materials and Devices, Qianwan Institute of CNITECH, Ningbo, Zhejiang, 315336, P.R. China.

<sup>2</sup>International Joint Research Center of China for Optoelectronic and Energy Materials, Energy Research Institute, Yunnan University, Kunming, Yunnan 650091, P.R. China.

<sup>3</sup>Laboratory of Advanced Nano-Optoelectronic Materials and Devices, Ningbo Institute of Materials Technology and Engineering, Chinese Academy of Science, Ningbo, Zhejiang, 315201, P.R. China.

<sup>4</sup>Zhejiang Provincial Engineering Research Center of Energy Optoelectronic Materials and Devices, Ningbo Institute of Materials Technology & Engineering, Chinese Academy of Sciences, Ningbo, Zhejiang, 315201, P.R. China.

## Materials

Lead(II) acetate trihydrate( $\text{Pb}(\text{Ac})_2 \cdot 3\text{H}_2\text{O}$ , 99.998%, Macklin), hexamethyl disilathiane ( $\text{TMS}_2$ , 98%, J&K, China), oleic acid(OA, 90%, Alfa Aesar), octadecene (ODE, 90%, Alfa Aesar), octane( $\text{C}_8\text{H}_{18}$ ,  $\geq 99\%$ , Aladdin), ethyl acetate ( $\text{C}_4\text{H}_8\text{O}_2$ ,  $\geq 99.8\%$ , Macklin), ethanol ( $\text{C}_2\text{H}_6\text{O}$ ,  $\geq 99.0\%$ , Sigma-Aldrich), zinc acetate dehydrate ( $\text{Zn}(\text{Ac})_2 \cdot 2\text{H}_2\text{O}$ ,  $\geq 99.0\%$ , Sigma-Aldrich), tetramethylammonium hydroxide pentahydrate ( $(\text{CH}_3)_4\text{N}(\text{OH}) \cdot 5\text{H}_2\text{O}$ ,  $\geq 95\%$ , Sigma-Aldrich) dimethyl sulfoxide (DMSO, anhydrous grade, Sigma-Aldrich), ethanol-amine ( $\text{HO}(\text{CH}_2)_2\text{NH}_2$ , 99.5%, Sigma-Aldrich), 2-Methoxyethanol ( $\text{C}_3\text{H}_8\text{O}_2$ , 99.5%, Sigma-Aldrich), 1,2-Ethanedithiol ( $\text{C}_2\text{H}_6\text{S}_2$ ,  $\geq 98\%$ , Alfa Aesar), acetonitrile (ACN,  $\geq 99.9\%$ , Aladdin), and copper indium selenium sulfur ( $\text{CuInSeS}$ , purchased from Fullnano Co., Ltd, China) were used as received with no further purification.

## Synthesis of Colloidal PbS QDs

This experiment employs the synthetic approach for producing PbS CQDs, following the methodology as described by Wu et al.[1] Initially, a mixture containing 4 mmol of  $\text{Pb}(\text{Ac})_2 \cdot 3\text{H}_2\text{O}$ , 3.0 mL of oleic acid, and 20 mL of ODE is introduced into a 50 mL three-necked flask. The solution is stirred at room temperature for 0.5 hours and subsequently degassed at 125 °C for 1 hour. The resultant solution is then heated to 150 °C and maintained at this temperature for 4 hours to yield the Pb precursor. Following this step, the solution is cooled down to 110 °C, and the sulfur (S) source is introduced. For the preparation of the S source, 440  $\mu\text{L}$  of  $\text{TMS}_2$  (stored in a nitrogen glovebox) and 3.6 mL of pre-degassed ODE are combined in a 5 mL vial, thoroughly stirred to form the S source. This S source is rapidly injected into the Pb source, and the reaction proceeds for 5 minutes, after which the solution is allowed to naturally cool to room

temperature. Subsequently, 0.5 mL of oleic acid, 5 mL of ethyl acetate, and 15 mL of anhydrous ethanol are added to the solution. The mixture is then subjected to centrifugation at 8000 rpm for 1 minute. Upon removal of the supernatant, 3 mL of n-hexane and 30 mL of anhydrous ethanol are added to the remaining solution, followed by another centrifugation step at 10000 rpm for 3 minutes, repeating this process once. Finally, the resulting precipitate is dissolved in 8 mL of n-octane to obtain the PbS-OA solution.

### **Synthesis of ZnO nanoparticle**

This experiment follows the synthetic method for ZnO as proposed by Qian et al.[2] Zinc acetate and tetramethylammonium hydroxide (TMAH) were used as starting materials, and a solution precipitation method was employed to synthesize zinc oxide nanoparticles. A solution consisting of 25 mL of zinc acetate in dimethyl sulfoxide (DMSO) and a 30 mL solution of TMAH in ethanol were mixed and stirred for 1 hour under ambient conditions. Subsequently, the resulting mixture was washed and dispersed in ethanol at a concentration of 30 mg/mL.

### **Preparation of NiO<sub>x</sub> Precursor**

Nickel oxide precursor solution was fabricated by sol-gel method: 24.885 mg of nickel acetate tetrahydrate and 6.1  $\mu$ L of ethanolamine were dissolved into 1 mL of ethanol, which was stirred at 65 °C for 2 h to form a stable sol-gel.

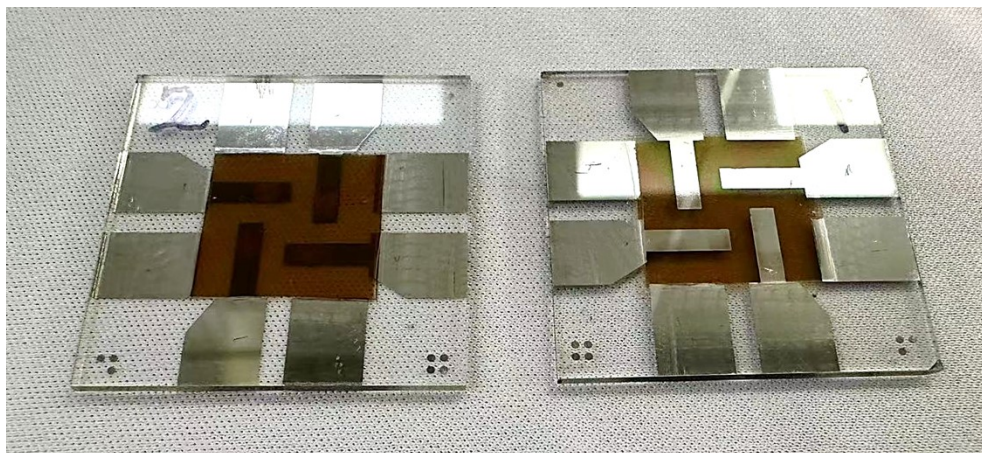

**Figure S1.** The authentic front and back images of the device.

(a)

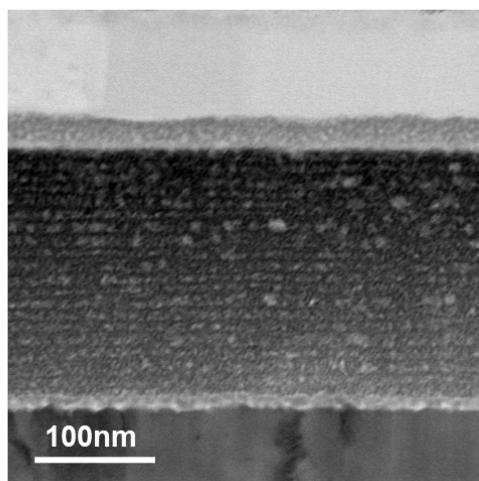

(b)

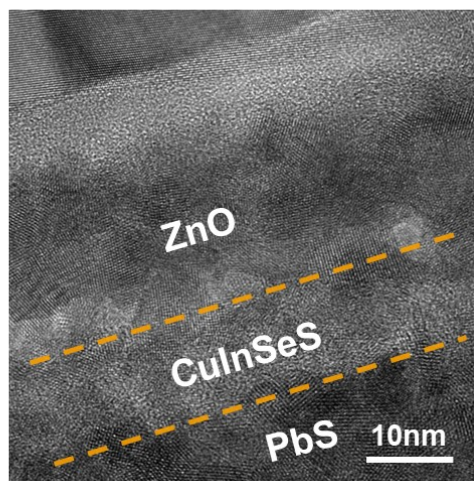

**Figure S2.** TEM image of the CuInSeS interface layer.

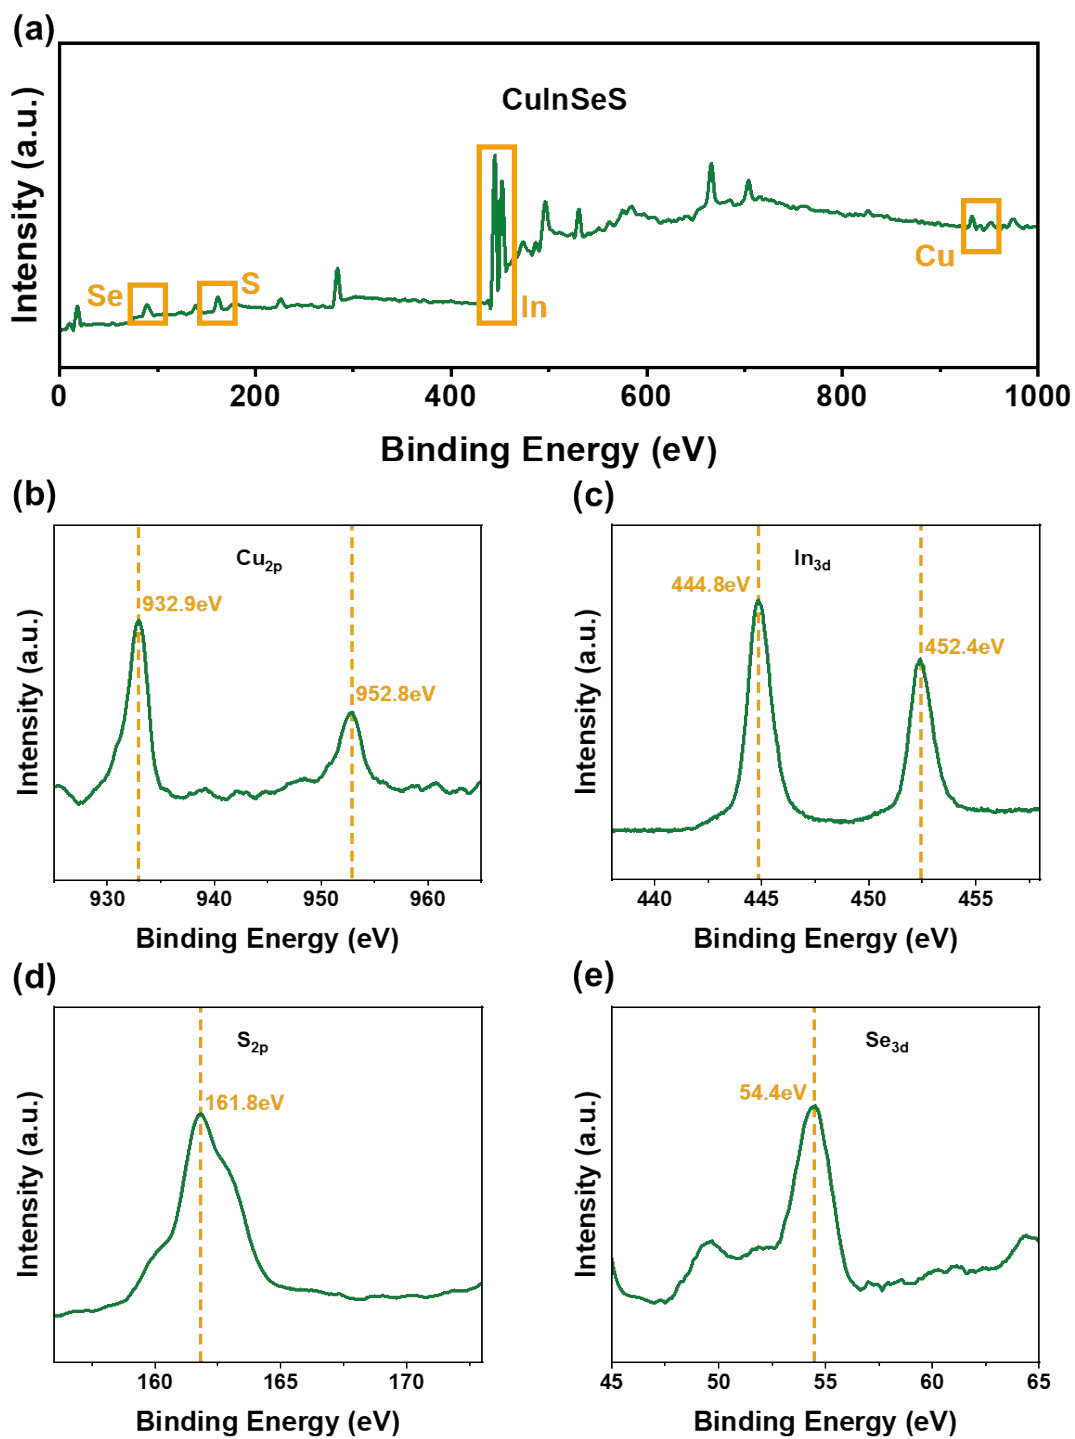

**Figure S3.** XPS characterization results for CuInSeS. (a) XPS survey spectra of CuInSeS. (b) high-resolution XPS spectra of Cu<sub>2p</sub>. (c) high-resolution XPS spectra of In<sub>3d</sub>. (d) high-resolution XPS spectra of S<sub>2p</sub>. (e) high-resolution XPS spectra of Se<sub>3d</sub>

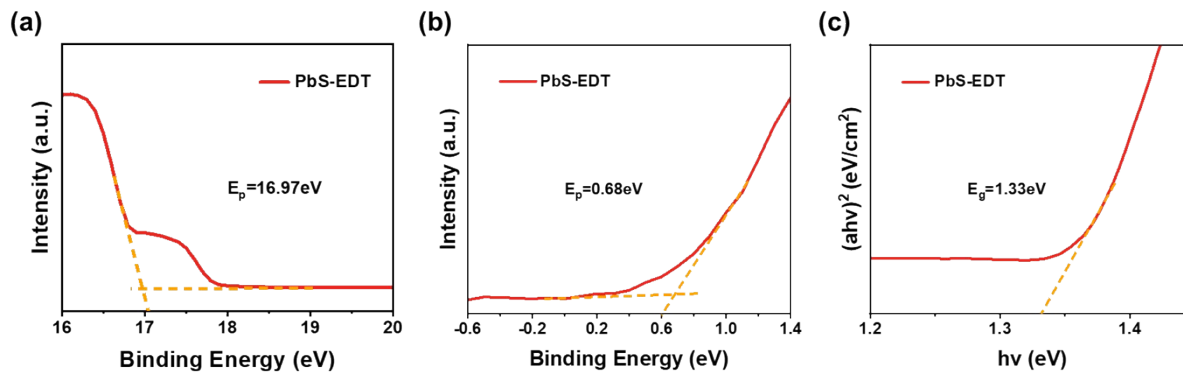

**Figure S4.** (a) UPS spectra of the secondary electron cutoff region of PbS-EDT and (b) the valence band cutoff region of PbS-EDT. (c)  $(ahv)^2 \cdot hv$  plots of PbS-EDT layer

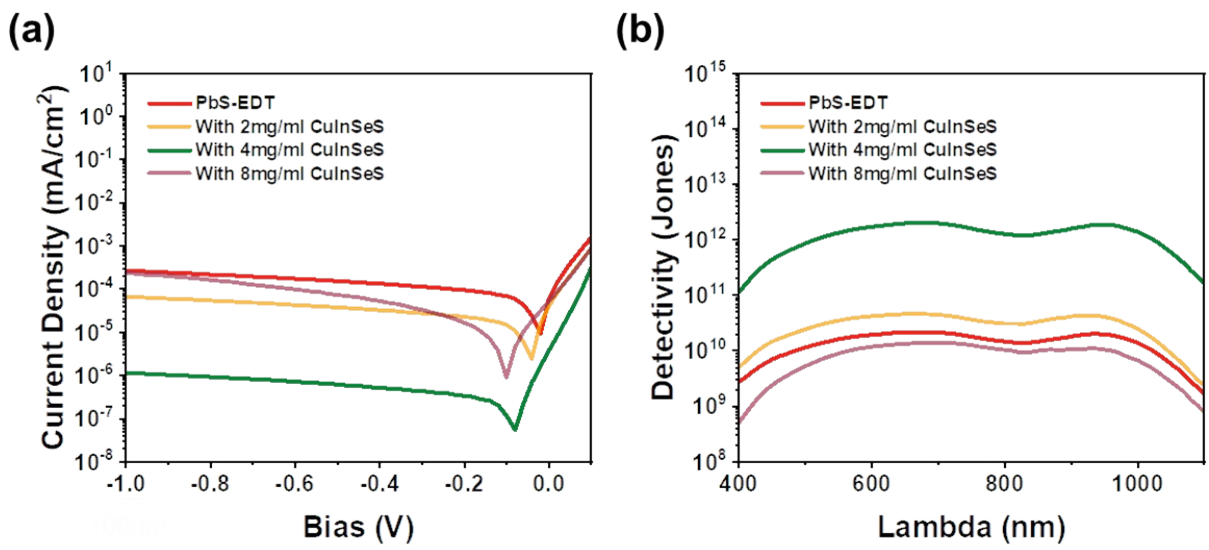

**Figure S5.** (a) Dark current density versus voltage curves ( $J_{\text{dark}}-V$ ) for PbS-EDT and PbS-EDT/CuInSeS (different concentration) device. (b) Detectivity for the different devices operating at a negative bias of 1V.



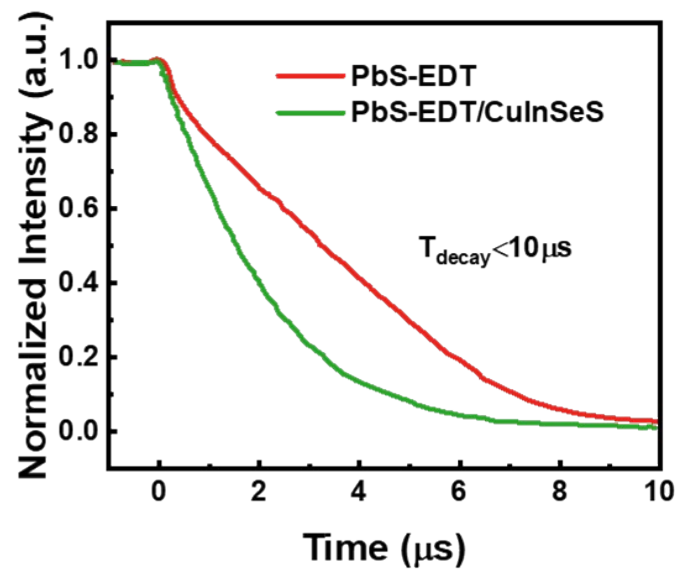

**Figure S6.** Temporal response comparison of PbS-EDT and PbS-EDT/CuInSeS devices.

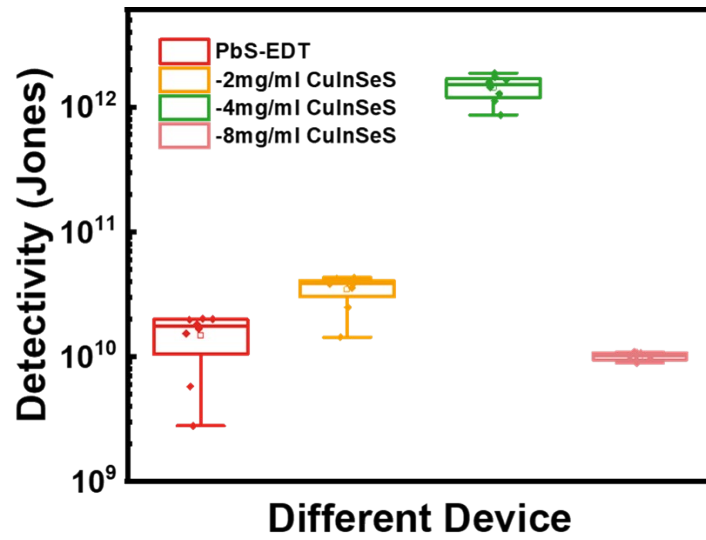

**Figure S7.** Detectivity of devices with different concentrations of the CuInSeS functional layer. Each dataset comprises data from 8 devices.

| Material            | Dark current (mA/cm <sup>2</sup> ) | Response range (nm) | EQE (%)   | D*max (Jones)         | Ref.      |
|---------------------|------------------------------------|---------------------|-----------|-----------------------|-----------|
| PbS/CuInSeS         | $2.19 \times 10^{-7}$              | ~940nm              | 29.9%     | $8.57 \times 10^{12}$ | This work |
| PbS                 | $1.32 \times 10^{-4}$              | ~1300 nm            | 50.28%    | $2.15 \times 10^{12}$ | [3]       |
| PbS                 | $10^{-4}$                          | 1350 nm and 930 nm  | 24%       | $2 \times 10^{11}$    | [4]       |
| CuInSe <sub>2</sub> | $10^{-7}$                          | 370nm               | -         | $1.6 \times 10^{12}$  | [5]       |
| CuInS <sub>2</sub>  | $10^{-5}$                          | 500~600nm           | R=0.86A/W | $3.8 \times 10^{11}$  | [6]       |

**Table S1.** Comparison table between this work and other similar studies

## References:

- [1] C. Wu, S. Ding, L. Zhang, F. Huang, G. Qiu, J. Yang, F. Yu, T. Sun, L. Qian, C. Xiang, Enhancing the Absorbance and Carrier Extraction of Lead Sulfide Quantum Dot Solar Cells by the Bilayer ZnO with a Self - Assembly Optical Structure, *Solar RRL*, 7 (2023), <https://doi.org/10.1002/solr.202300019>.
- [2] L. Qian, Y. Zheng, J. Xue, P.H. Holloway, Stable and efficient quantum-dot light-emitting diodes based on solution-processed multilayer structures, *Nature Photonics*, 5 (2011) 543-548, <https://doi.org/10.1038/nphoton.2011.171>.
- [3] S. Lu, P. Liu, J. Yang, S. Liu, Y. Yang, L. Chen, J. Liu, Y. Liu, B. Wang, X. Lan, J. Zhang, L. Gao, J. Tang, High-Performance Colloidal Quantum Dot Photodiodes via Suppressing Interface Defects, *ACS Appl Mater Interfaces*, 15 (2023) 12061-12069, <https://doi.org/10.1021/acsami.2c22774>.
- [4] O. Atan, J.M. Pina, D.H. Parmar, P. Xia, Y. Zhang, A. Gulsaran, E.D. Jung, D. Choi, M. Imran, M. Yavuz, S. Hoogland, E.H. Sargent, Control over Charge Carrier Mobility in the Hole Transport Layer Enables Fast Colloidal Quantum Dot Infrared Photodetectors, *Nano Lett*, 23 (2023) 4298-4303, <https://doi.org/10.1021/acs.nanolett.3c00491>.
- [5] R. Guo, T. Shen, J. Tian, Broadband hybrid organic/CuInSe<sub>2</sub> quantum dot photodetectors, *Journal of Materials Chemistry C*, 6 (2018) 2573-2579, <https://doi.org/10.1039/c8tc00288f>.
- [6] Y. Liu, C. Zhao, J. Li, S. Zhao, X. Xu, H.Y. Fu, C. Yu, F. Kang, G. Wei, Highly Sensitive CuInS<sub>2</sub>/ZnS Core-Shell Quantum Dot Photodetectors, *ACS Applied Electronic Materials*, 3 (2021) 1236-1243, <https://doi.org/10.1021/acsaelm.0c01064>.
